# Supplementary material for: Novel ReBaCo1.5Mn0.5O5+δ (Re: La, Pr, Nd, Sm, Gd and Y) perovskite oxide: influence of manganese doping on the crystal structure, oxygen nonstoichiometry, thermal expansion, transport properties, and application as a cathode material in solid oxide fuel cells
Source: Royal Society of Chemistry journal article supplement (doi:10.1039/c8ta03479f), 2018-01-01
Supplement: c8ta03479f1.pdf [file c8ta03479f1.pdf]

**Novel  $\text{ReBaCo}_{1.5}\text{Mn}_{0.5}\text{O}_{5+\delta}$  (Re: La, Pr, Nd, Sm, Gd and Y) perovskite oxides: influence of manganese doping on crystal structure, oxygen nonstoichiometry, thermal expansion, transport properties, and application as cathode materials in Solid Oxide Fuel Cells**

Anna Olszewska<sup>a</sup>, Zhihong Du<sup>b</sup>, Konrad Świerczek<sup>a,c#</sup>, Hailei Zhao<sup>b,d\*</sup>, Bogdan Dabrowski<sup>e</sup>

<sup>a</sup>AGH University of Science and Technology, Faculty of Energy and Fuels,  
ul. A. Mickiewicza 30, 30-059 Krakow, Poland

<sup>b</sup>University of Science and Technology Beijing, School of Materials Science and Engineering,  
Beijing 100083, China

<sup>c</sup>AGH Centre of Energy, AGH University of Science and Technology,  
ul. Czarnowiejska 36, 30-054 Krakow, Poland

<sup>d</sup>Beijing Munciple Key Lab for Advanced Energy Materials and Technologies,  
Beijing 100083, China

<sup>e</sup>Department of Physics, Northern Illinois University, DeKalb, Illinois 60115, USA

#xi@agh.edu.pl

\*hlzhao@ustb.edu.cn

**Supplementary Information**

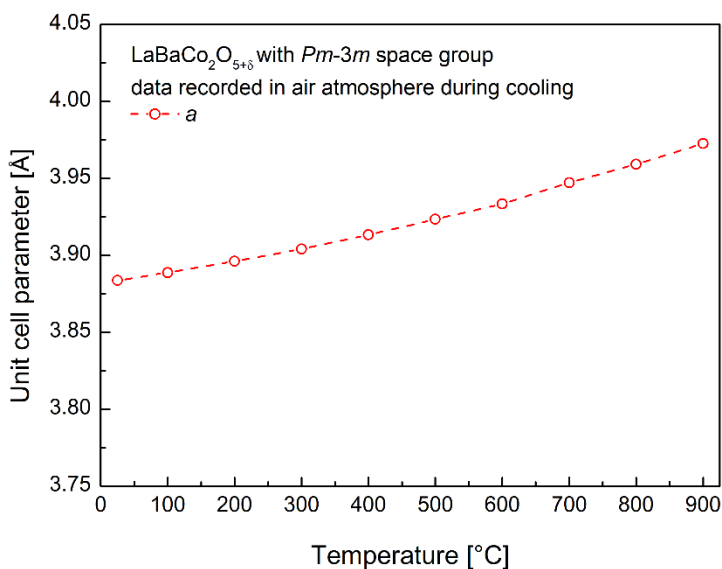

Fig. S1a. Temperature dependence of the unit cell parameter for  $\text{LaBaCo}_2\text{O}_{5+\delta}$ .

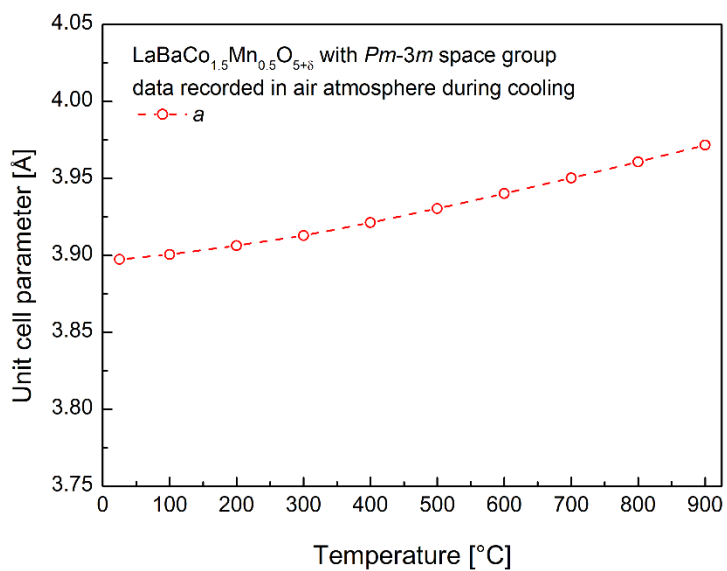

Fig. S1b. Temperature dependence of the unit cell parameter for LaBaCo<sub>1.5</sub>Mn<sub>0.5</sub>O<sub>5+δ</sub>.

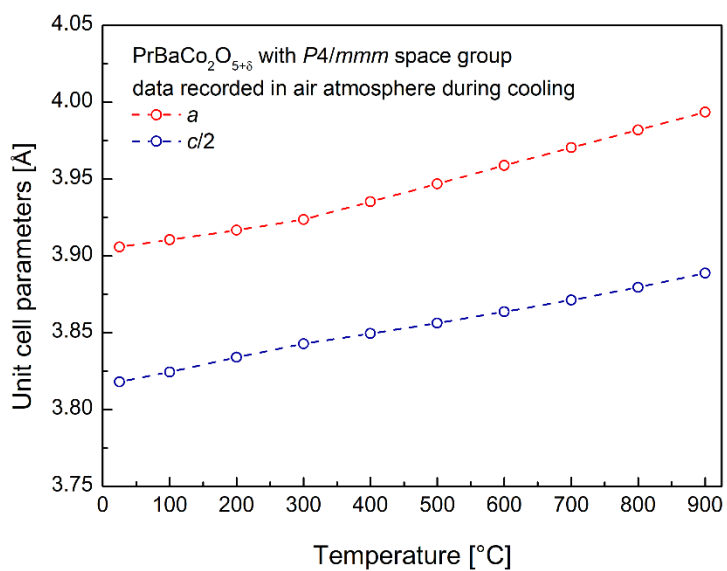

Fig. S2a. Temperature dependence of the unit cell parameters for PrBaCo<sub>2</sub>O<sub>5+δ</sub>.

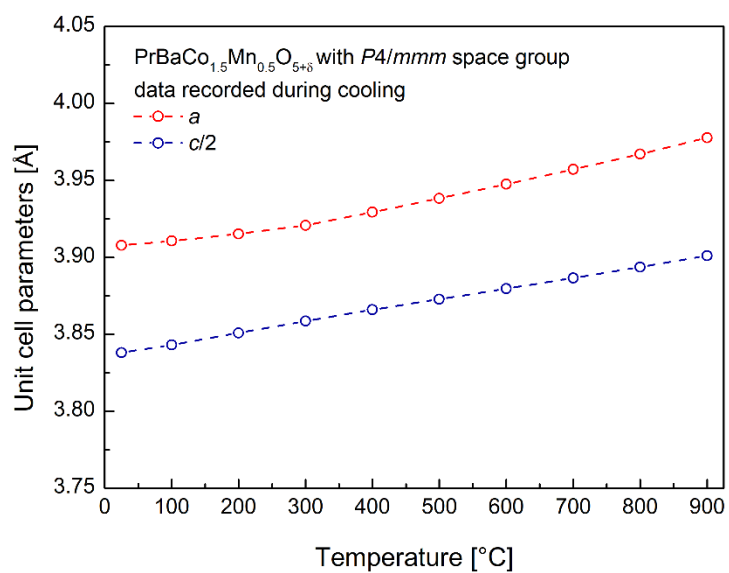

Fig. S2b. Temperature dependence of the unit cell parameters for PrBaCo<sub>1.5</sub>Mn<sub>0.5</sub>O<sub>5+δ</sub>.

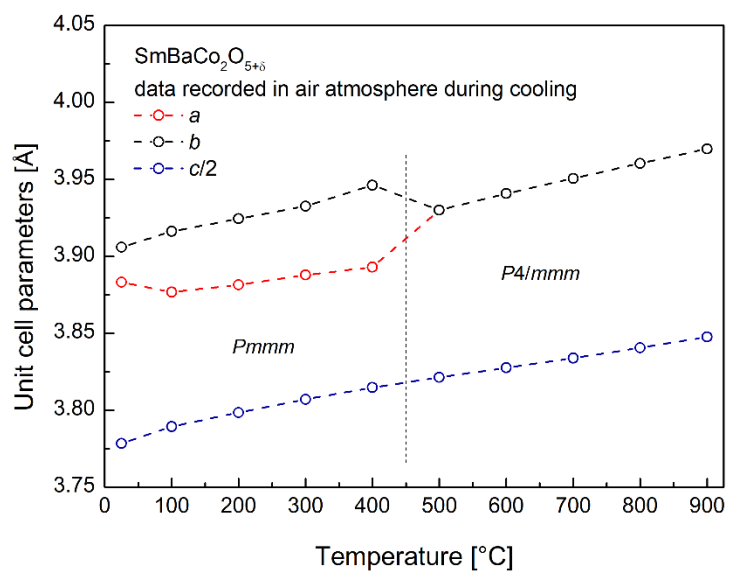

Fig. S3a. Temperature dependence of the unit cell parameters for SmBaCo<sub>2</sub>O<sub>5+δ</sub>.

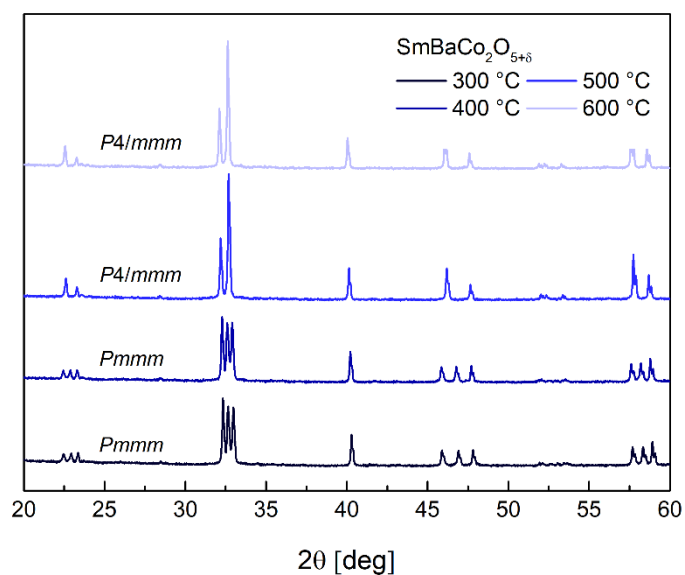

Fig. S3b. Selected range of XRD data for SmBaCo<sub>2</sub>O<sub>5+δ</sub> recorded at different temperatures.

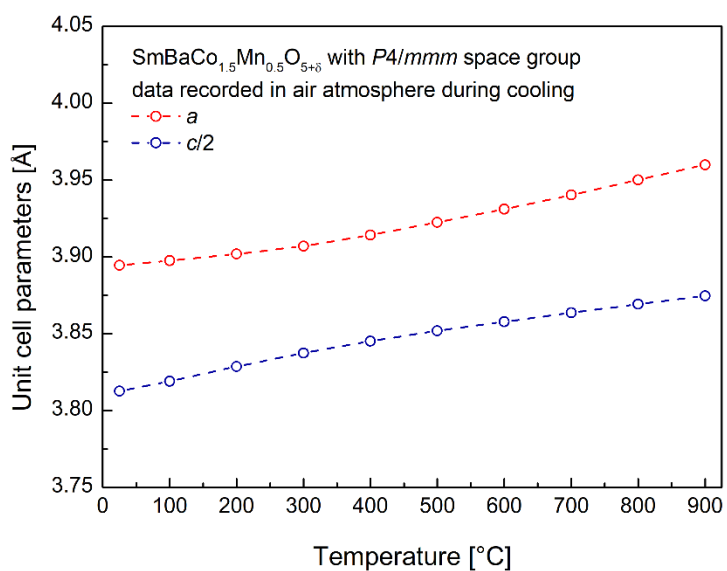

Fig. S3c. Temperature dependence of the unit cell parameters for SmBaCo<sub>1.5</sub>Mn<sub>0.5</sub>O<sub>5+δ</sub>.

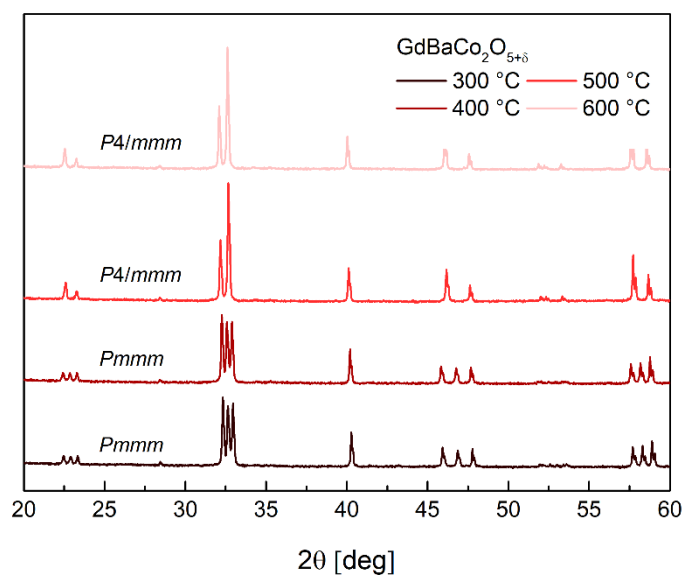

Fig. S4. Selected range of XRD data for  $\text{GdBaCo}_2\text{O}_{5+\delta}$  recorded at different temperatures.

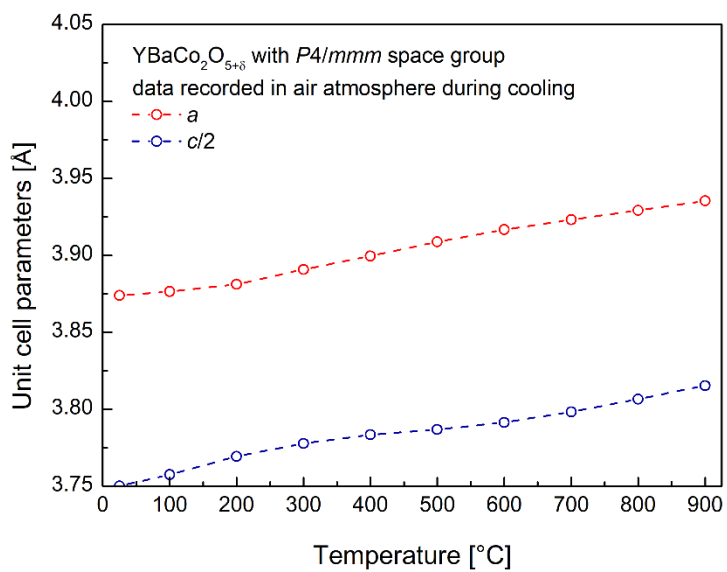

Fig. S5a. Temperature dependence of the unit cell parameters for  $\text{YBaCo}_2\text{O}_{5+\delta}$ .

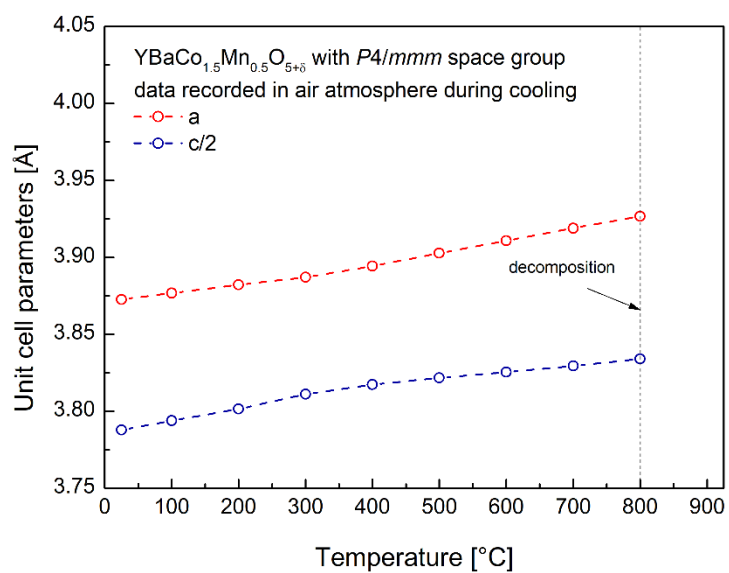

Fig. S5b. Temperature dependence of the unit cell parameters for YBaCo<sub>1.5</sub>Mn<sub>0.5</sub>O<sub>5+δ</sub>.

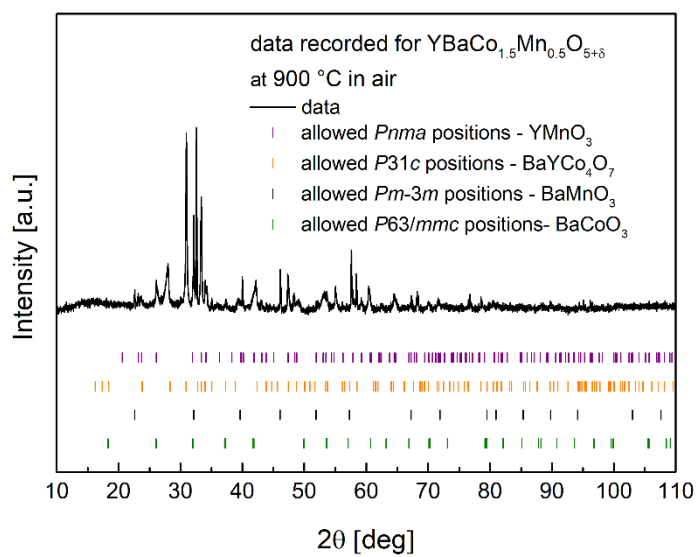

Fig. S5c. Decomposition of YBaCo<sub>1.5</sub>Mn<sub>0.5</sub>O<sub>5+δ</sub> as visible in HT-XRD measurement at 900 °C.

Tab. S1. Values of the oxygen content, calculated for 600, 700, 800 and 900 °C for  $\text{ReBaCo}_2\text{O}_{5+\delta}$  and  $\text{ReBaCo}_{1.5}\text{Mn}_{0.5}\text{O}_{5+\delta}$  oxides ( $\pm 0.01$ ).

|                                                                           | 600 °C | 700 °C | 800 °C | 900 °C |
|---------------------------------------------------------------------------|--------|--------|--------|--------|
| <b><math>\text{ReBaCo}_2\text{O}_{5+\delta}</math></b>                    |        |        |        |        |
| <b>La</b>                                                                 | 5.74   | 5.67   | 5.61   | 5.54   |
| <b>Pr</b>                                                                 | 5.55   | 5.49   | 5.43   | 5.36   |
| <b>Nd</b>                                                                 | 5.51   | 5.45   | 5.39   | 5.33   |
| <b>Sm</b>                                                                 | 5.43   | 5.37   | 5.30   | 5.25   |
| <b>Gd</b>                                                                 | 5.33   | 5.25   | 5.18   | 5.12   |
| <b>Y</b>                                                                  | 5.06   | 5.02   | 4.99   | 4.99   |
| <b><math>\text{ReBaCo}_{1.5}\text{Mn}_{0.5}\text{O}_{5+\delta}</math></b> |        |        |        |        |
| <b>La</b>                                                                 | 5.84   | 5.79   | 5.74   | 5.69   |
| <b>Pr</b>                                                                 | 5.74   | 5.70   | 5.65   | 5.60   |
| <b>Nd</b>                                                                 | 5.71   | 5.67   | 5.62   | 5.57   |
| <b>Sm</b>                                                                 | 5.62   | 5.57   | 5.51   | 5.46   |
| <b>Gd</b>                                                                 | 5.54   | 5.49   | 5.43   | 5.38   |
| <b>Y</b>                                                                  | 5.40   | 5.33   | 5.27   | 5.25   |

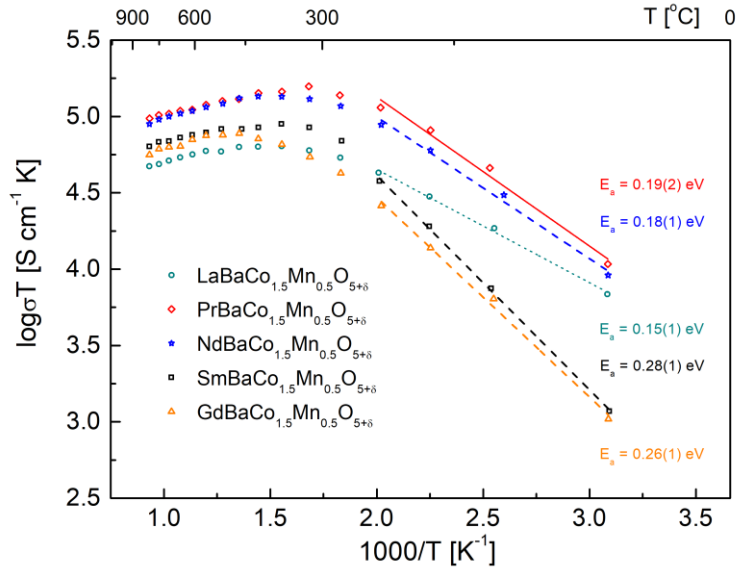

Fig. S6. Arrhenius-type plot used to calculate activation energy of the electrical conductivity of  $\text{ReBaCo}_{1.5}\text{Mn}_{0.5}\text{O}_{5+\delta}$ .  $E_a$  was estimated in 50-200 °C range.

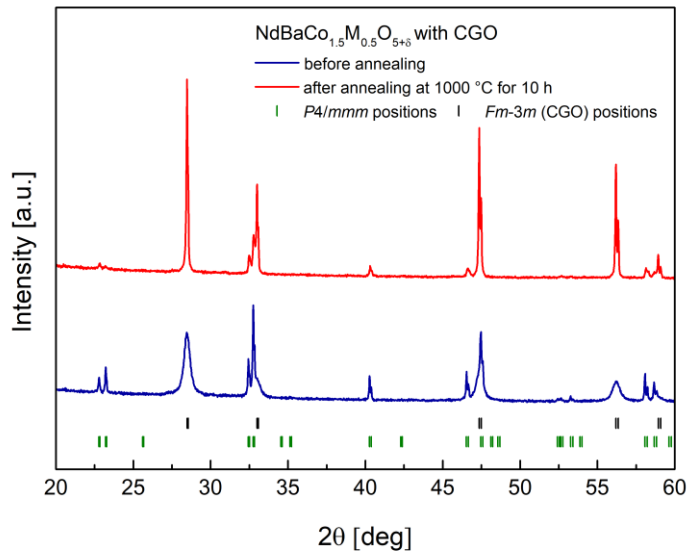

Fig. S7a. XRD patterns recorded for NdBaCo<sub>1.5</sub>Mn<sub>0.5</sub>O<sub>5+δ</sub> mixed with CGO, before and after annealing at 1000 °C. Please notice that CGO-related peaks become very narrow after heat treatment.

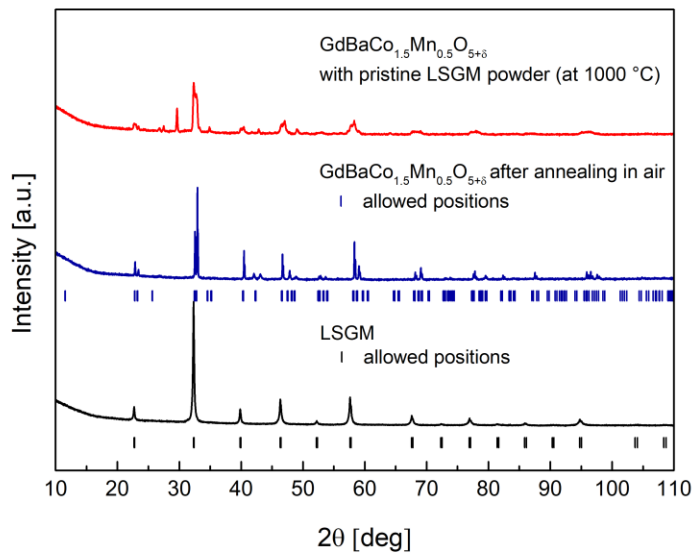

Fig. S7b. XRD studies of GdBaCo<sub>1.5</sub>Mn<sub>0.5</sub>O<sub>5+δ</sub> stability in relation to LSGM electrolyte.



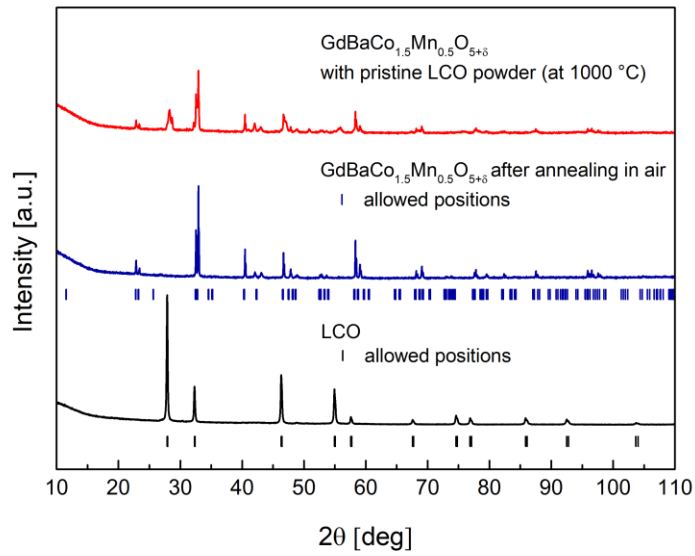

Fig. S7c. XRD studies of GdBaCo<sub>1.5</sub>Mn<sub>0.5</sub>O<sub>5+δ</sub> stability in relation to LCO electrolyte.

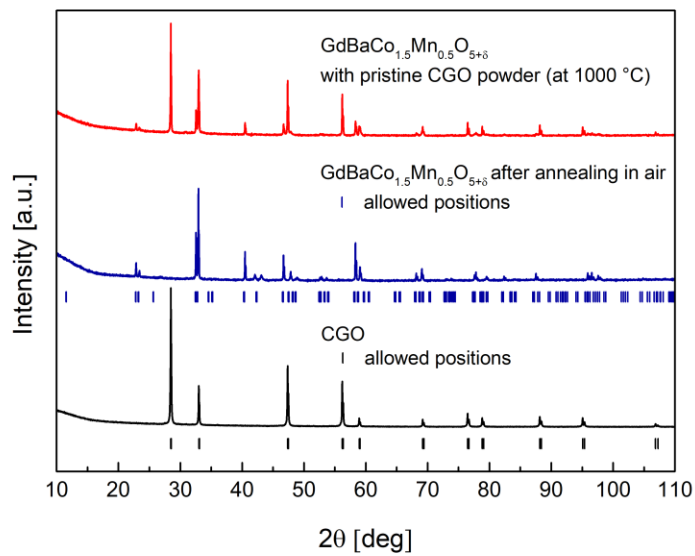

Fig. S7d. XRD studies of GdBaCo<sub>1.5</sub>Mn<sub>0.5</sub>O<sub>5+δ</sub> stability in relation to CGO electrolyte.

Tab. S2. Refined values of the unit cell parameters and FWHM of the main perovskite peak for  $\text{NdBaCo}_{1.5}\text{Mn}_{0.5}\text{O}_{5+\delta}$  and  $\text{GdBaCo}_{1.5}\text{Mn}_{0.5}\text{O}_{5+\delta}$  oxides after stability tests with pristine LSGM, LCO and CGO electrolytes.

|                                                                           | $a$ parameter [ $\text{\AA}$ ] | $c$ parameter [ $\text{\AA}$ ] | FWHM [deg] |
|---------------------------------------------------------------------------|--------------------------------|--------------------------------|------------|
| <b><math>\text{NdBaCo}_{1.5}\text{Mn}_{0.5}\text{O}_{5+\delta}</math></b> |                                |                                |            |
| 1000 °C, air                                                              | 3.9003(1)                      | 7.6562(1)                      | 0.075      |
| + LSGM (1000 °C)                                                          | 3.8469(1)                      | 7.6852(1)                      | 0.339      |
| + LCO (1000 °C)                                                           | 3.9018(1)                      | 7.6595(1)                      | 0.104      |
| + CGO (1000 °C)                                                           | 3.8977(1)                      | 7.6592(1)                      | 0.124      |
| + CGO (1100 °C)                                                           | 3.8942(1)                      | 7.6508(1)                      | 0.172      |
| + CGO (1200 °C)                                                           | 3.8954(1)                      | 7.6550(1)                      | 0.162      |
| <b><math>\text{GdBaCo}_{1.5}\text{Mn}_{0.5}\text{O}_{5+\delta}</math></b> |                                |                                |            |
| 1000 °C, air                                                              | 3.8877(1)                      | 7.5996(1)                      | 0.075      |
| + LSGM (1000 °C)                                                          | 3.8746(1)                      | 7.7209(1)                      | 0.473      |
| + LCO (1000 °C)                                                           | 3.8879(1)                      | 7.6063(1)                      | 0.117      |
| + CGO (1000 °C)                                                           | 3.8862(1)                      | 7.6010(1)                      | 0.116      |
| + CGO (1100 °C)                                                           | 3.8882(1)                      | 7.6013(1)                      | 0.154      |
| + CGO (1200 °C)                                                           | 3.8900(1)                      | 7.5989(1)                      | 0.152      |

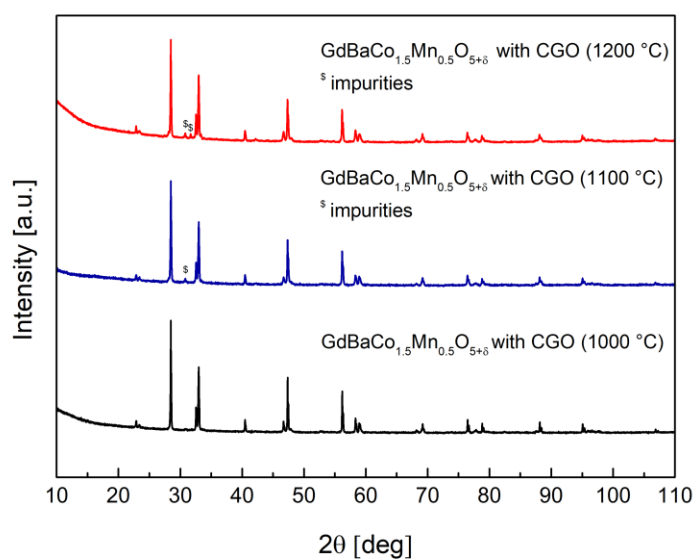

Fig. S8. XRD studies of  $\text{GdBaCo}_{1.5}\text{Mn}_{0.5}\text{O}_{5+\delta}$  stability in relation to CGO electrolyte at different temperatures.

Tab. S3. Values of cathodic polarization  $R_p$  as a function of temperature determined for symmetrical cells with  $\text{NdBaCo}_{1.5}\text{Mn}_{0.5}\text{O}_{5+\delta}$  cathode layers synthesized at different temperatures and sintered in 1000-1200 °C range.

| sintering temperature<br>[°C] | measurement temperature                                    |       |              |
|-------------------------------|------------------------------------------------------------|-------|--------------|
|                               | [°C]                                                       |       |              |
|                               | 800                                                        | 850   | 900          |
| <b>synthesized at 1200 °C</b> | <b><math>R_p</math> [<math>\Omega \text{ cm}^2</math>]</b> |       |              |
| 1000                          | 1.556                                                      | 0.848 | 0.409        |
| 1100                          | 0.346                                                      | 0.206 | 0.122        |
| 1200                          | 5.248                                                      | 2.235 | 1.017        |
| <b>synthesized at 1000 °C</b> | <b><math>R_p</math> [<math>\Omega \text{ cm}^2</math>]</b> |       |              |
| 1050                          | 0.420                                                      | 0.238 | 0.139        |
| 1075                          | 0.372                                                      | 0.202 | 0.112        |
| 1100                          | 0.117                                                      | 0.070 | <b>0.043</b> |
| 1125                          | 0.387                                                      | 0.234 | 0.141        |

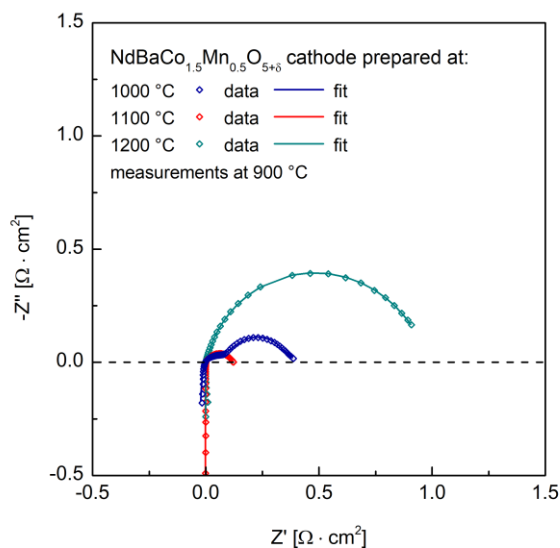

Fig. S9. Measured impedance data for symmetrical cells with  $\text{NdBaCo}_{1.5}\text{Mn}_{0.5}\text{O}_{5+\delta}$  cathode synthesized at 1200 °C and prepared at different temperatures. Ohmic resistance was subtracted and the values were divided by two, due to the symmetric configuration, which allowed to estimate cathodic polarization  $R_p$ .
